# Supplementary material for: An aptasensor based on fluorescence resonance energy transfer for multiplexed pathogenic bacteria determination
Source: Royal Society of Chemistry journal article supplement (doi:10.1039/c5ay02608c), 2015-11-25
Supplement: c5ay02608c1.pdf [file c5ay02608c1.pdf]

Electronic Supplementary Information

**Aptasensor based on fluorescence resonance energy transfer for multiplexed  
pathogenic bacteria determination**

Nuo Duan, Wenhui Gong, Zhouping Wang and Shijia Wu \*

**Table S1** Simultaneous determination results for *V. parahaemolyticus*, *S. aureus* and *S. typhimurium*.

| Bacteria                   | Linear equation  | R      | Linear range<br>(cfu/mL)         | LOD<br>(cfu/mL) | RSD<br>(n=7) |
|----------------------------|------------------|--------|----------------------------------|-----------------|--------------|
| <i>V. parahaemolyticus</i> | Y=312.53x-318.8  | 0.9975 | 10 <sup>2</sup> -10 <sup>6</sup> | 25              | 4.3%         |
| <i>S. aureus</i>           | Y=271.44x-342.08 | 0.9990 | 10 <sup>2</sup> -10 <sup>6</sup> | 50              | 4.7%         |
| <i>S. typhimurium</i>      | Y=150.35x-256.16 | 0.9973 | 10 <sup>2</sup> -10 <sup>6</sup> | 50              | 4.9%         |

**Table S2** Quantification of *V. parahaemolyticus*, *S. aureus* and *S. typhimurium* cells in spiked milk and salmon samples by the proposed method.

| Sample   | Spiked concentration by counting method (cfu/mL) |                   |                       | Measured concentration by developed method (cfu/mL) (mean $\pm$ SD) |                              |                              |
|----------|--------------------------------------------------|-------------------|-----------------------|---------------------------------------------------------------------|------------------------------|------------------------------|
|          | <i>V. parahaemolyticus</i>                       | <i>S. aureus</i>  | <i>S. typhimurium</i> | <i>V. parahaemolyticus</i>                                          | <i>S. aureus</i>             | <i>S. typhimurium</i>        |
|          | Milk 1                                           | $1.0 \times 10^3$ | $1.0 \times 10^3$     | $1.0 \times 10^3$                                                   | $(1.0 \pm 0.02) \times 10^3$ | $(1.0 \pm 0.21) \times 10^3$ |
| Milk 2   | $1.0 \times 10^4$                                | $1.0 \times 10^4$ | $1.0 \times 10^4$     | $(0.9 \pm 0.13) \times 10^4$                                        | $(1.0 \pm 0.15) \times 10^4$ | $(1.0 \pm 0.17) \times 10^4$ |
| Milk 3   | $1.0 \times 10^5$                                | $1.0 \times 10^5$ | $1.0 \times 10^5$     | $(0.9 \pm 0.11) \times 10^5$                                        | $(1.0 \pm 0.17) \times 10^5$ | $(0.9 \pm 0.16) \times 10^5$ |
| Salmon 1 | $1.0 \times 10^3$                                | $1.0 \times 10^3$ | $1.0 \times 10^3$     | $(1.2 \pm 0.17) \times 10^3$                                        | $(0.9 \pm 0.15) \times 10^3$ | $(1.1 \pm 0.15) \times 10^3$ |
| Salmon 2 | $1.0 \times 10^4$                                | $1.0 \times 10^4$ | $1.0 \times 10^4$     | $(1.1 \pm 0.09) \times 10^4$                                        | $(1.0 \pm 0.13) \times 10^4$ | $(1.2 \pm 0.08) \times 10^4$ |
| Salmon 3 | $1.0 \times 10^5$                                | $1.0 \times 10^5$ | $1.0 \times 10^5$     | $(1.2 \pm 1.13) \times 10^5$                                        | $(1.0 \pm 0.10) \times 10^5$ | $(1.0 \pm 0.20) \times 10^5$ |

SD: standard deviation (n=7)

**Table S3.** Summary of LOD for bacteria detection with various method reported by previous papers

| Method                                                                    | LOD                                                                                       |                                         | Ref        |
|---------------------------------------------------------------------------|-------------------------------------------------------------------------------------------|-----------------------------------------|------------|
| Fluorescence spectra                                                      | <i>Escherichia coli</i>                                                                   | 10 <sup>3</sup> -10 <sup>4</sup> cfu/mL | 1          |
|                                                                           | <i>Salmonella</i>                                                                         |                                         |            |
|                                                                           | <i>Campylobacter</i>                                                                      |                                         |            |
| a multi-channel SPR sensor                                                | <i>E. coli</i>                                                                            | 1.4×10 <sup>4</sup> cfu/mL              | 2          |
|                                                                           | <i>S. choleraesuis</i>                                                                    | 4.4 ×10 <sup>4</sup> cfu/mL             |            |
|                                                                           | <i>C. jejuni</i>                                                                          | 1.1 ×10 <sup>5</sup> cfu/mL             |            |
|                                                                           | <i>L. monocytogenes</i>                                                                   | 3.5× 10 <sup>3</sup> cfu/mL             |            |
| high-throughput suspension array technology                               | <i>E. coli</i> O157:H7,<br><i>Shigella</i> ,<br><i>S. aureus</i> , and<br><i>Listeria</i> | 1 cfu/mL                                | 3          |
|                                                                           | <i>Salmonella</i> and <i>V. parahaemolyticus</i>                                          | 10 cfu/mL                               |            |
| electrochemical immunosensor arrays                                       | <i>E. sakazakii</i>                                                                       | 4.57×10 <sup>3</sup> cfu/mL             | 4          |
|                                                                           | <i>E. coli</i> O157:H7                                                                    | 3.27×10 <sup>3</sup> cfu/mL             |            |
| Fluorescent nanocrystals based-flow-cytometry                             | <i>B. anthracis</i>                                                                       | 10 <sup>3</sup> cfu/mL                  | 5          |
|                                                                           | <i>Y. pestis</i>                                                                          |                                         |            |
| HRP-amplification-based DNA microarray sensor                             | <i>Bacillus anthracis</i> ,                                                               | 0.75 pM                                 | 6          |
|                                                                           | <i>Yersinia pestis</i>                                                                    |                                         |            |
|                                                                           | <i>Escherichia coli</i>                                                                   |                                         |            |
|                                                                           | <i>Bacillus subtilis</i>                                                                  |                                         |            |
| Microscale impedance based metabolic activity detection-based methodology | <i>L. innocua</i>                                                                         | 100 cfu/mL                              | 7          |
|                                                                           | <i>L. monocytogenes</i>                                                                   | 200 cfu/mL                              |            |
|                                                                           | <i>E. coli</i>                                                                            | 40 cfu/mL                               |            |
| Fluorescence bioassay                                                     | <i>S. typhimurium</i>                                                                     | 5 cfu/mL                                | 8          |
|                                                                           | <i>S. aureus</i>                                                                          | 8 cfu/mL                                |            |
| multicolor upconversion nanoparticles labels                              | <i>S. aureus</i>                                                                          | 25 cfu/mL                               | 9          |
|                                                                           | <i>V. parahaemolyticus</i>                                                                | 10 cfu/mL                               |            |
|                                                                           | <i>S. typhimurium</i>                                                                     | 15 cfu/mL                               |            |
| Aptasensor based on FRET                                                  | <i>V. parahaemolyticus</i>                                                                | 25 cfu/mL                               | Our method |
|                                                                           | <i>S. aureus</i>                                                                          | 50 cfu/mL                               |            |
|                                                                           | <i>S. typhimurium</i>                                                                     | 50 cfu/mL                               |            |

## Reference

1. M. Sohn, D.S. Himmelsbach, F.E. Barton and P. Fedorka-Cray, *J Appl Spectrosc*, 2009, **63**, 1251-1255.
2. A.D. Taylor, J. Ladd, Q.M. Yu, S.F. Chen, J.R. Homola and S.Y. Jiang, *Biosensor. Bioelectron*, 2006, **22**, 752-758.
3. Z.Y. Sun, Y. Peng, M.C. Zhang, K. Wang, J.L. Bai, X.L. Li, B.A. Ning and Z.X. Gao, *Food Control*, 2014, **40**, 300-309.
4. W.C. Dou, W.L. Tang and G.Y. Zhao, *Electrochim. Acta*, 2013, **97**, 79-85.
5. E. Zahavy, V. Heleg-Shabtai, Y. Zafrani, D. Marciano and S. Yitzhaki, *J. Fluoresc.*, 2010, **20**, 389-399.
6. A.L. Ghindilis, M.W. Smith, K.R. Schwarzkopf, K.M. Roth, K. Peyvan, S.B. Munro, M.J. Lodes, A.G. Stöver, K. Bernards, K. Dill and A. McShea, *Biosens. Bioelectron*, 2007, **22**, 1853-1860.
7. R. Gómez, R. Bashir and A.K. Bhunia, *Sensors Actuat. B*, 2002, **86**, 198-208.
8. N. Duan, S.J. Wu, C.Q. Zhu, X.Y. Ma, Z.P. Wang, Y. Yu and Y. Jiang, *Anal Chim Acta*, 2012, **723**: 1-6.
9. S.J. Wu, N. Duan, Z. Shi, C.C. Fang and Z.P. Wang, *Anal Chem*, 2014, **86**, 3100-3107.
